# Supplementary material for: Arming T Cells with a gp100-Specific TCR and a CSPG4-Specific CAR Using Combined DNA- and RNA-Based Receptor Transfer
Source: Cancers (Basel). 2019 May 20;11(5):696. doi: 10.3390/cancers11050696 (PMC6562862; doi:10.3390/cancers11050696)
Supplement: Supplementary file 1 [file cancers-11-00696-s001.pdf]

# Supplementary Materials: Arming T Cells with a gp100-Specific TCR and a CSPG4-Specific CAR Using Combined DNA- and RNA-Based Receptor Transfer

Bianca Simon, Dennis C. Harrer, Beatrice Schuler-Thurner, Gerold Schuler and Ugur Uslu

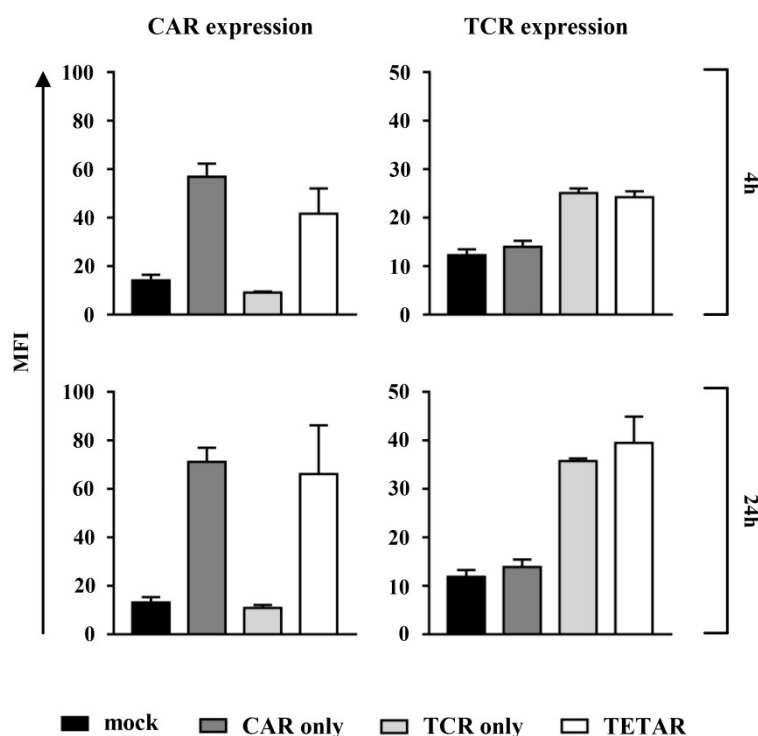

**Figure S1.** Gp100 TCR and CSPG4 CAR expression of TETARs. CD8<sup>+</sup> T cells were lentivirally transduced with a gp100-specific TCR (TCR only) and electroporated with mRNA coding for the CSPG4-specific CAR (TETARs), as indicated. Non-transduced T cells were either transfected without mRNA (mock) or with CSPG4-specific CAR mRNA (CAR only). Mock-transfected cells served as negative control. The surface expression of the gp100-specific TCR and the CSPG4-specific CAR were assessed in a time-course experiment. Receptor expression levels were measured at 4 and 24 hours after electroporation. Average geometric mean values of CAR and TCR stainings of 3 independent experiments with SEM are shown.

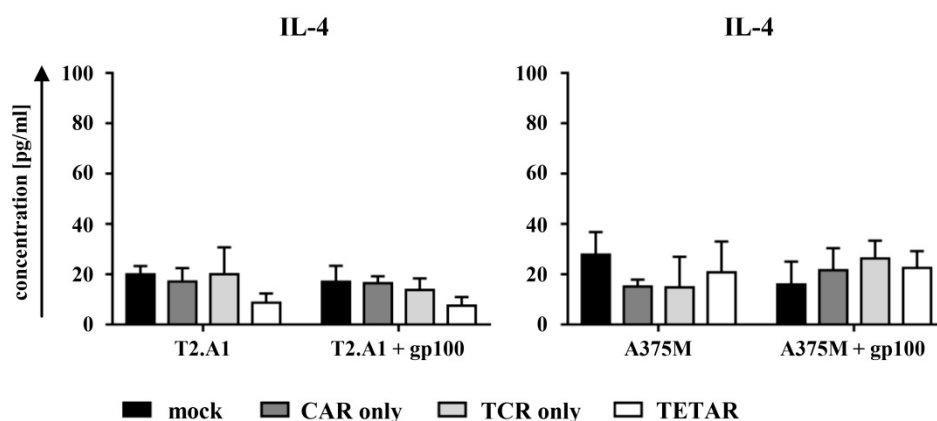

**Figure S2.** Antigen-specific IL-4 production of TETARs. CD8<sup>+</sup> T cells were lentivirally transduced with a gp100-specific TCR (TCR only) and electroporated with mRNA coding for the CSPG4-specific CAR (TETARs). Non-transduced T cells were either transfected without mRNA (mock) or with CSPG4-specific CAR mRNA (CAR only). Mock-transfected cells were used as negative control. T cells were co-incubated overnight with either gp100 peptide-loaded or unpulsed T2.A1 (HLA-A2<sup>+</sup>, CSPG4<sup>-</sup>, gp100<sup>-</sup>)

and A375M (HLA-A2<sup>+</sup>, CSPG4<sup>+</sup>, gp100<sup>-</sup>) target cells. The production of IL-4 was measured in a cytometric bead array (CBA). Mean values of 4 independent experiments with SEM are shown.

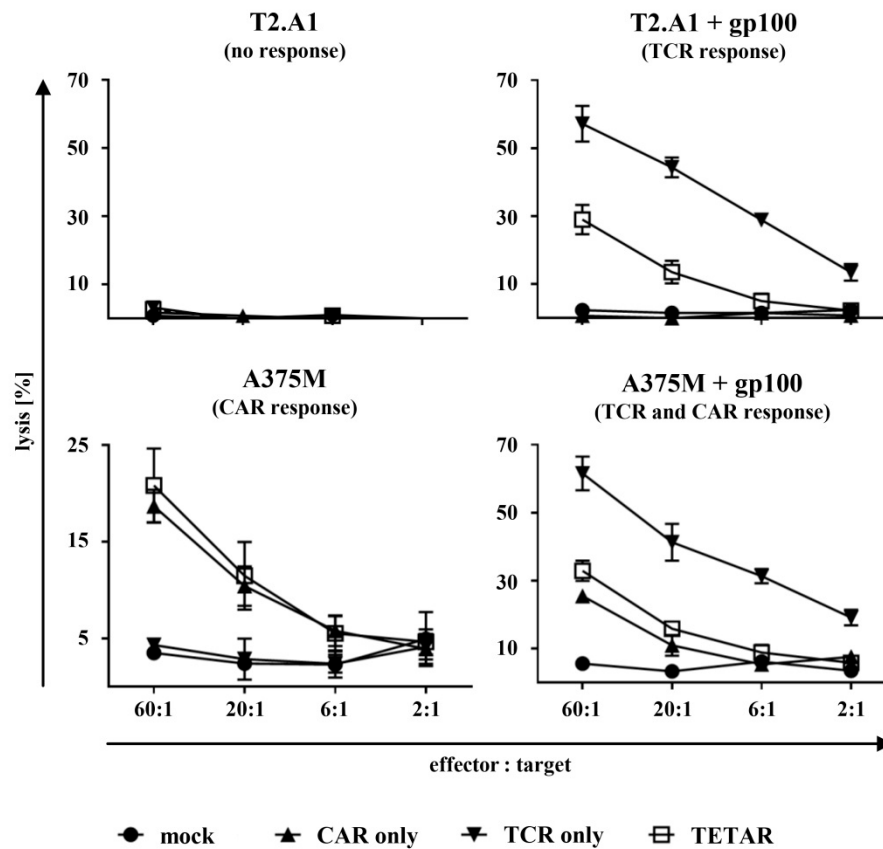

**Figure S3.** TETARs show antigen-specific cytotoxicity. CD8<sup>+</sup> T cells were lentivirally transduced with a gp100-specific TCR (TCR only) and electroporated with mRNA coding for the CSPG4-specific CAR (TETARs). Non-transduced T cells were either transfected without mRNA (mock) or with CSPG4-specific CAR mRNA (CAR only). Mock-transfected cells were used as negative control. One day after electroporation, T cells were co-incubated for 4–6 hours with either gp100 peptide-loaded or unpulsed T2.A1 (HLA-A2<sup>+</sup>, CSPG4<sup>-</sup>, gp100<sup>-</sup>) and A375M (HLA-A2<sup>+</sup>, CSPG4<sup>+</sup>, gp100<sup>-</sup>) target cells. Lytic capacity of T cells was examined in a <sup>51</sup>chromium-release assay and the percentages of lysed cells were calculated at following effector to target ratios (E:T): 60:1, 20:1, 6:1, 2:1. Mean values of 4 independent experiments ± SEM are shown. The *p*-values were calculated by unpaired Student's *t*-test and are listed in Table S3.

**Table S1.** *p*-values <sup>1</sup> corresponding to Figure 2C.

| Conditions CAR <sup>+</sup> | Time points |    |     |
|-----------------------------|-------------|----|-----|
|                             | 4h          | 8h | 24h |
| CAR only vs. TETAR          | ns          | ns | ns  |

<sup>1</sup> calculated by unpaired Student's *t*-test from 3 independent experiments, ns *p* > 0.1.

**Table S2.** *p*-values <sup>1</sup> corresponding to Figure 3.

| Conditions TNF          | T2.A1 + gp100 | A375M  | A375M + gp100 |
|-------------------------|---------------|--------|---------------|
| mock vs CAR only        | ns            | **     | **            |
| mock vs TCR only        | *             | ns     | **            |
| mock vs TETAR           | *             | *      | *             |
| Conditions IFN $\gamma$ | T2.A1 + gp100 | A375M  | A375M + gp100 |
| mock vs CAR only        | ns            | 0.0799 | 0.0904        |
| mock vs TCR only        | **            | ns     | **            |
| mock vs TETAR           | ns            | ns     | 0.0736        |

<sup>1</sup> calculated by unpaired Student's *t*-test from 4 independent experiments, \*\*  $p \leq 0.01$ , \*  $p \leq 0.05$ , ns  $p > 0.1$ , *p*-values between 0.05 and 0.1 are specified.

**Table S3.** *p*-values <sup>1</sup> corresponding to Figure 4 and S3.

| Conditions 60:1  | T2.A1 | T2.A1 + gp100 | A375M  | A375M + gp100 |
|------------------|-------|---------------|--------|---------------|
| mock vs CAR only | ns    | ns            | **     | **            |
| mock vs TCR only | ns    | **            | ns     | **            |
| mock vs TETAR    | ns    | **            | **     | **            |
| Conditions 20:1  | T2.A1 | T2.A1 + gp100 | A375M  | A375M + gp100 |
| mock vs CAR only | ns    | ns            | **     | *             |
| mock vs TCR only | ns    | **            | ns     | **            |
| mock vs TETAR    | ns    | *             | 0.0429 | **            |
| Conditions 6:1   | T2.A1 | T2.A1 + gp100 | A375M  | A375M + gp100 |
| mock vs CAR only | ns    | ns            | ns     | ns            |
| mock vs TCR only | ns    | **            | ns     | **            |
| mock vs TETAR    | ns    | ns            | ns     | ns            |
| Conditions 2:1   | T2.A1 | T2.A1 + gp100 | A375M  | A375M + gp100 |
| mock vs CAR only | ns    | ns            | ns     | *             |
| mock vs TCR only | ns    | **            | ns     | **            |
| mock vs TETAR    | ns    | ns            | ns     | ns            |

<sup>1</sup> calculated by unpaired Student's *t*-test from 4 independent experiments, \*\*  $p \leq 0.01$ , \*  $p \leq 0.05$ , ns  $p > 0.1$ , *p*-values between 0.05 and 0.1 are specified.

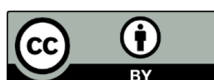

© 2019 by the authors. Licensee MDPI, Basel, Switzerland. This article is an open access article distributed under the terms and conditions of the Creative Commons Attribution (CC BY) license (<http://creativecommons.org/licenses/by/4.0/>).
